# Supplementary material for: Bitter taste receptor T2R38 is expressed on skin-infiltrating lymphocytes and regulates lymphocyte migration
Source: PubMed Central journal article supplement (PMC9276799; doi:10.1038/s41598-022-15999-6), 2022-07-11
Supplement: 41598_2022_15999_MOESM1_ESM.pdf [file 41598_2022_15999_MOESM1_ESM.pdf]

## Supplementary information

### **Bitter taste receptor T2R38 is expressed on skin-infiltrating lymphocytes and regulates lymphocyte migration**

Moe Sakakibara<sup>1</sup>, Hayakazu Sumida<sup>1\*</sup>, Keisuke Yanagida<sup>2</sup>, Sosuke Miyasato<sup>3</sup>, Motonao Nakamura<sup>3</sup>,  
Shinichi Sato<sup>1</sup>

#### **Affiliations of the authors**

<sup>1</sup>Department of Dermatology, Faculty of Medicine, The University of Tokyo, Bunkyo-Ku, Tokyo, Japan.

<sup>2</sup>Department of Lipid Signaling, National Center for Global Health and Medicine, Shinjuku-ku, Tokyo, Japan.

<sup>3</sup>Department of Bioscience, Graduate School of Life Science, Okayama University of Science, Okayama, Japan.

**Corresponding author:** Hayakazu Sumida, MD, PhD

Department of Dermatology, Faculty of Medicine, The University of Tokyo, 7-3-1, Hongo, Bunkyo-Ku, Tokyo, 113-8655, Japan.

E-mail: [sumida-tky@umin.ac.jp](mailto:sumida-tky@umin.ac.jp)

Tel.: +81 3 5800 8661

Fax: +81 3 3814 1503

## Supplementary Table 1

### Row data for *GAPDH* in PCR assays from skin samples

| sample name       | Target       | CT value    |
|-------------------|--------------|-------------|
| Healthy skin No.1 | <i>GAPDH</i> | 23.96975708 |
| Healthy skin No.2 | <i>GAPDH</i> | 22.54921341 |
| Healthy skin No.3 | <i>GAPDH</i> | 22.74416351 |
| Healthy skin No.4 | <i>GAPDH</i> | 21.17991638 |
| Healthy skin No.5 | <i>GAPDH</i> | 21.6879158  |
| AD skin No.1      | <i>GAPDH</i> | 22.31202698 |
| AD skin No.2      | <i>GAPDH</i> | 22.04991722 |
| AD skin No.3      | <i>GAPDH</i> | 23.56932449 |
| AD skin No.4      | <i>GAPDH</i> | 23.06023407 |
| AD skin No.5      | <i>GAPDH</i> | 20.09181595 |
| AD skin No.6      | <i>GAPDH</i> | 21.82665062 |
| AD skin No.7      | <i>GAPDH</i> | 23.96928406 |
| AD skin No.8      | <i>GAPDH</i> | 22.99201775 |
| AD skin No.9      | <i>GAPDH</i> | 22.86565018 |
| AD skin No.10     | <i>GAPDH</i> | 21.79933929 |
| AD skin No.11     | <i>GAPDH</i> | 22.20566368 |

AD, Atopic dermatitis
